# Supplementary material
Source: publisher figshare collection journal article supplement (https://karger.figshare.com/articles/dataset/_/5716099)
Supplement: Supplementary file 1 [file 1]

| Model  | Study name               | Subgroup within study | Statistics with study removed |             |             |         |         | Risk ratio (95% CI) with study removed |      |      |      |      |      |       |
|--------|--------------------------|-----------------------|-------------------------------|-------------|-------------|---------|---------|----------------------------------------|------|------|------|------|------|-------|
|        |                          |                       | Point                         | Lower limit | Upper limit | Z-Value | p-Value | 0.10                                   | 0.20 | 0.50 | 1.00 | 2.00 | 5.00 | 10.00 |
|        | Mease PJ et al., 2016    | Ixekizumab            | 2.083                         | 1.794       | 2.417       | 9.657   | 0.000   |                                        |      |      |      | +    |      |       |
|        | Mease PJ et al., 2015    | Secukinumab           | 1.987                         | 1.700       | 2.322       | 8.625   | 0.000   |                                        |      |      |      | +    |      |       |
|        | McInnes IB et al., 2015  | Secukinumab           | 2.064                         | 1.787       | 2.384       | 9.843   | 0.000   |                                        |      |      |      | +    |      |       |
|        | Mease PJ et al., 2014    | Brodalumab            | 2.040                         | 1.778       | 2.340       | 10.185  | 0.000   |                                        |      |      |      | +    |      |       |
|        | Ritchlin et al., 2014    | Ustekinumab           | 2.036                         | 1.770       | 2.342       | 9.957   | 0.000   |                                        |      |      |      | +    |      |       |
|        | McInnes IB et al., 2013  | Ustekinumab           | 2.084                         | 1.791       | 2.426       | 9.477   | 0.000   |                                        |      |      |      | +    |      |       |
|        | Gottlieb AB et al., 2009 | Ustekinumab           | 2.007                         | 1.750       | 2.302       | 9.975   | 0.000   |                                        |      |      |      | +    |      |       |
| Random |                          |                       | 2.042                         | 1.786       | 2.335       | 10.460  | 0.000   |                                        |      |      |      | +    |      |       |

**Suppl. Fig 3. Sensitivity analysis** - One study removed at a time and its effect on the primary end point effect estimates.
