# Supplementary material
Source: publisher figshare collection journal article supplement (https://karger.figshare.com/articles/dataset/_/5716099)
Supplement: Supplementary file 3 [file 1]

|               | Random sequence generation (selection bias) | Allocation concealment (selection bias) | Blinding of participants and personnel (performance bias) | Blinding of outcome assessment (detection bias) | Incomplete outcome data (attrition bias) | Selective reporting (reporting bias) | Other bias |
|---------------|---------------------------------------------|-----------------------------------------|-----------------------------------------------------------|-------------------------------------------------|------------------------------------------|--------------------------------------|------------|
| Gottlieb 2009 | +                                           | +                                       | +                                                         | +                                               | +                                        | +                                    | +          |
| McInnes 2013  | +                                           | +                                       | +                                                         | +                                               | +                                        | +                                    | +          |
| McInnes 2015  | +                                           | +                                       | +                                                         | +                                               | +                                        | +                                    | +          |
| Mease 2014    | +                                           | +                                       | +                                                         | +                                               | +                                        | +                                    | +          |
| Mease 2015    | +                                           | +                                       | +                                                         | +                                               | +                                        | +                                    | +          |
| Mease 2016    | +                                           | +                                       | +                                                         | +                                               | +                                        | +                                    | +          |
| Ritchin 2014  | +                                           | +                                       | +                                                         | +                                               | +                                        | +                                    | +          |

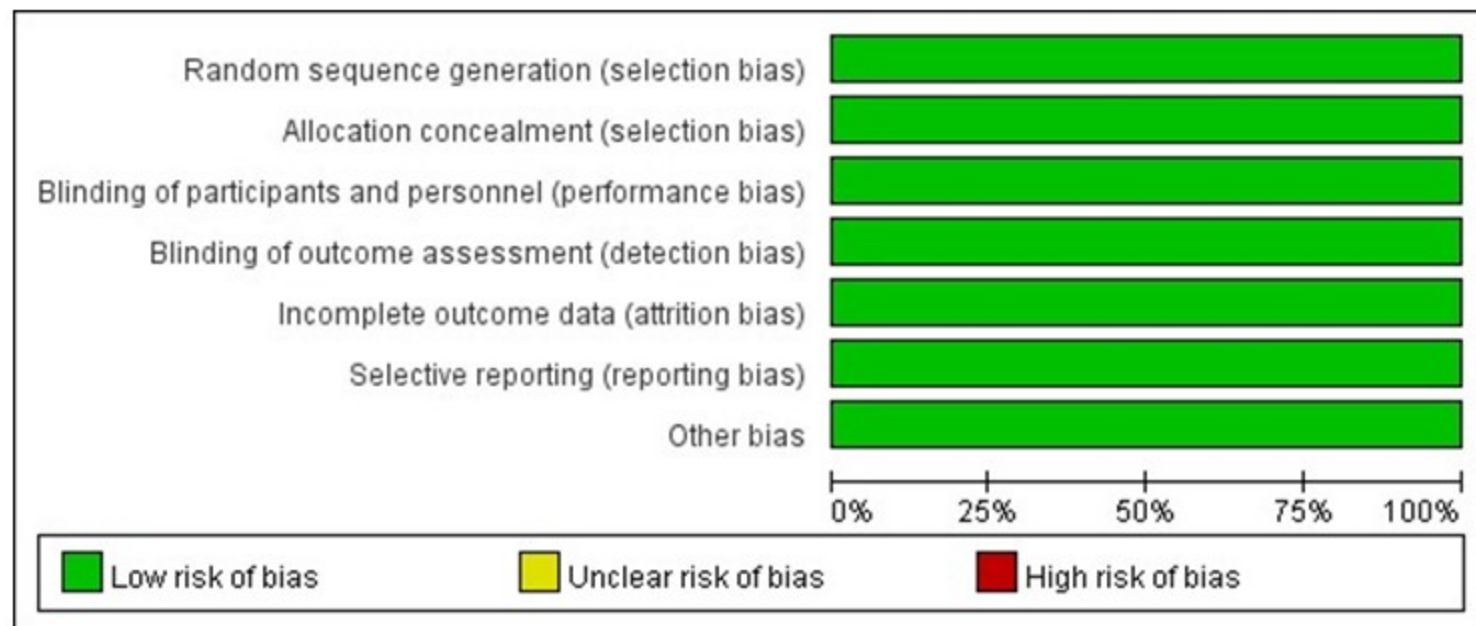

**Suppl. Fig. 1. Cochrane risk of bias tool for individual studies and across studies showing low risk of bias**
