# Supplementary material
Source: publisher figshare collection journal article supplement (https://karger.figshare.com/articles/dataset/_/5716099)
Supplement: Supplementary file 5 [file 1]

**Suppl. table 2. Search strategy**

| <b>Concept for search strategy</b> |                                                                                                                                                                                  |                                                                                             |
|------------------------------------|----------------------------------------------------------------------------------------------------------------------------------------------------------------------------------|---------------------------------------------------------------------------------------------|
| Step 1                             | <p>Concept 1</p> <p><b>Th17 pathway inhibitors</b></p>                                                                                                                           | <p>Concept 2</p> <p><b>Psoriatic Arthritis</b></p>                                          |
| Step 2                             | <p>IL17A inhibitors, secukinumab, ixekizumab, IL17R blockers, brodalumab, IL12/23 inhibitors, ustekinumab, IL23 inhibitors, tildrakizumab, guselkumab</p>                        | <p>psoriatic arthritis, PsA, active psoriatic arthritis, psoriatic arthropathy,</p>         |
| Step 3                             | <p>#1 = IL17A inhibitors OR secukinumab OR ixekizumab OR IL17R blockers OR brodalumab OR IL12/23 inhibitors OR ustekinumab OR IL23 inhibitors OR tildrakizumab OR guselkumab</p> | <p>#2 psoriatic arthritis OR PsA OR active psoriatic arthritis OR psoriatic arthropathy</p> |
| Step 4                             | <p>#1 AND #2</p>                                                                                                                                                                 |                                                                                             |

\* Only randomized controlled clinical trials will be considered for inclusion (phase 1 studies are excluded)

Full electronic search strategy for SCOPUS; Limiters: Till November 16<sup>th</sup> 2016, articles, abstracts or reviews. No language restrictions will be applied.

**SCOPUS search terms: (Articles published till 16 NOV 2016)**

((TITLE-ABS-KEY ( il17a inhibitor\*) OR TITLE-ABS-KEY (il17a blocker\*) OR TITLE-ABS-KEY (il17r inhibitor\*) OR TITLE-ABS-KEY (il17r blocker\*) OR TITLE-ABS-KEY (il12/23 inhibitor\*) OR TITLE-ABS-KEY (il12/23 blocker\*) OR TITLE-ABS-KEY (il23 inhibitor\*) OR TITLE-ABS-KEY (il23 blocker\*) OR TITLE-ABS-KEY (secukinumab\*) OR TITLE-ABS-KEY (ixekizumab\*) OR TITLE-ABS-KEY (brodalumab\*) OR TITLE-ABS-KEY (ustekinumab\*) OR TITLE-ABS-KEY (tildrakizumab\*) OR TITLE-ABS-KEY (guselkumab))) AND (ALL (psoriatic arthritis\*) OR TITLE-ABS-KEY (psa\*) OR TITLE-ABS-KEY (psoriatic arthropathy)) AND ((TITLE-ABS-KEY (trial\*)) OR (TITLE-ABS-KEY (random\*)) OR (TITLE-ABS-KEY (phase\*))))
