# Supplementary material
Source: publisher figshare collection journal article supplement (https://karger.figshare.com/articles/dataset/_/5716099)

# ACR70, week 24

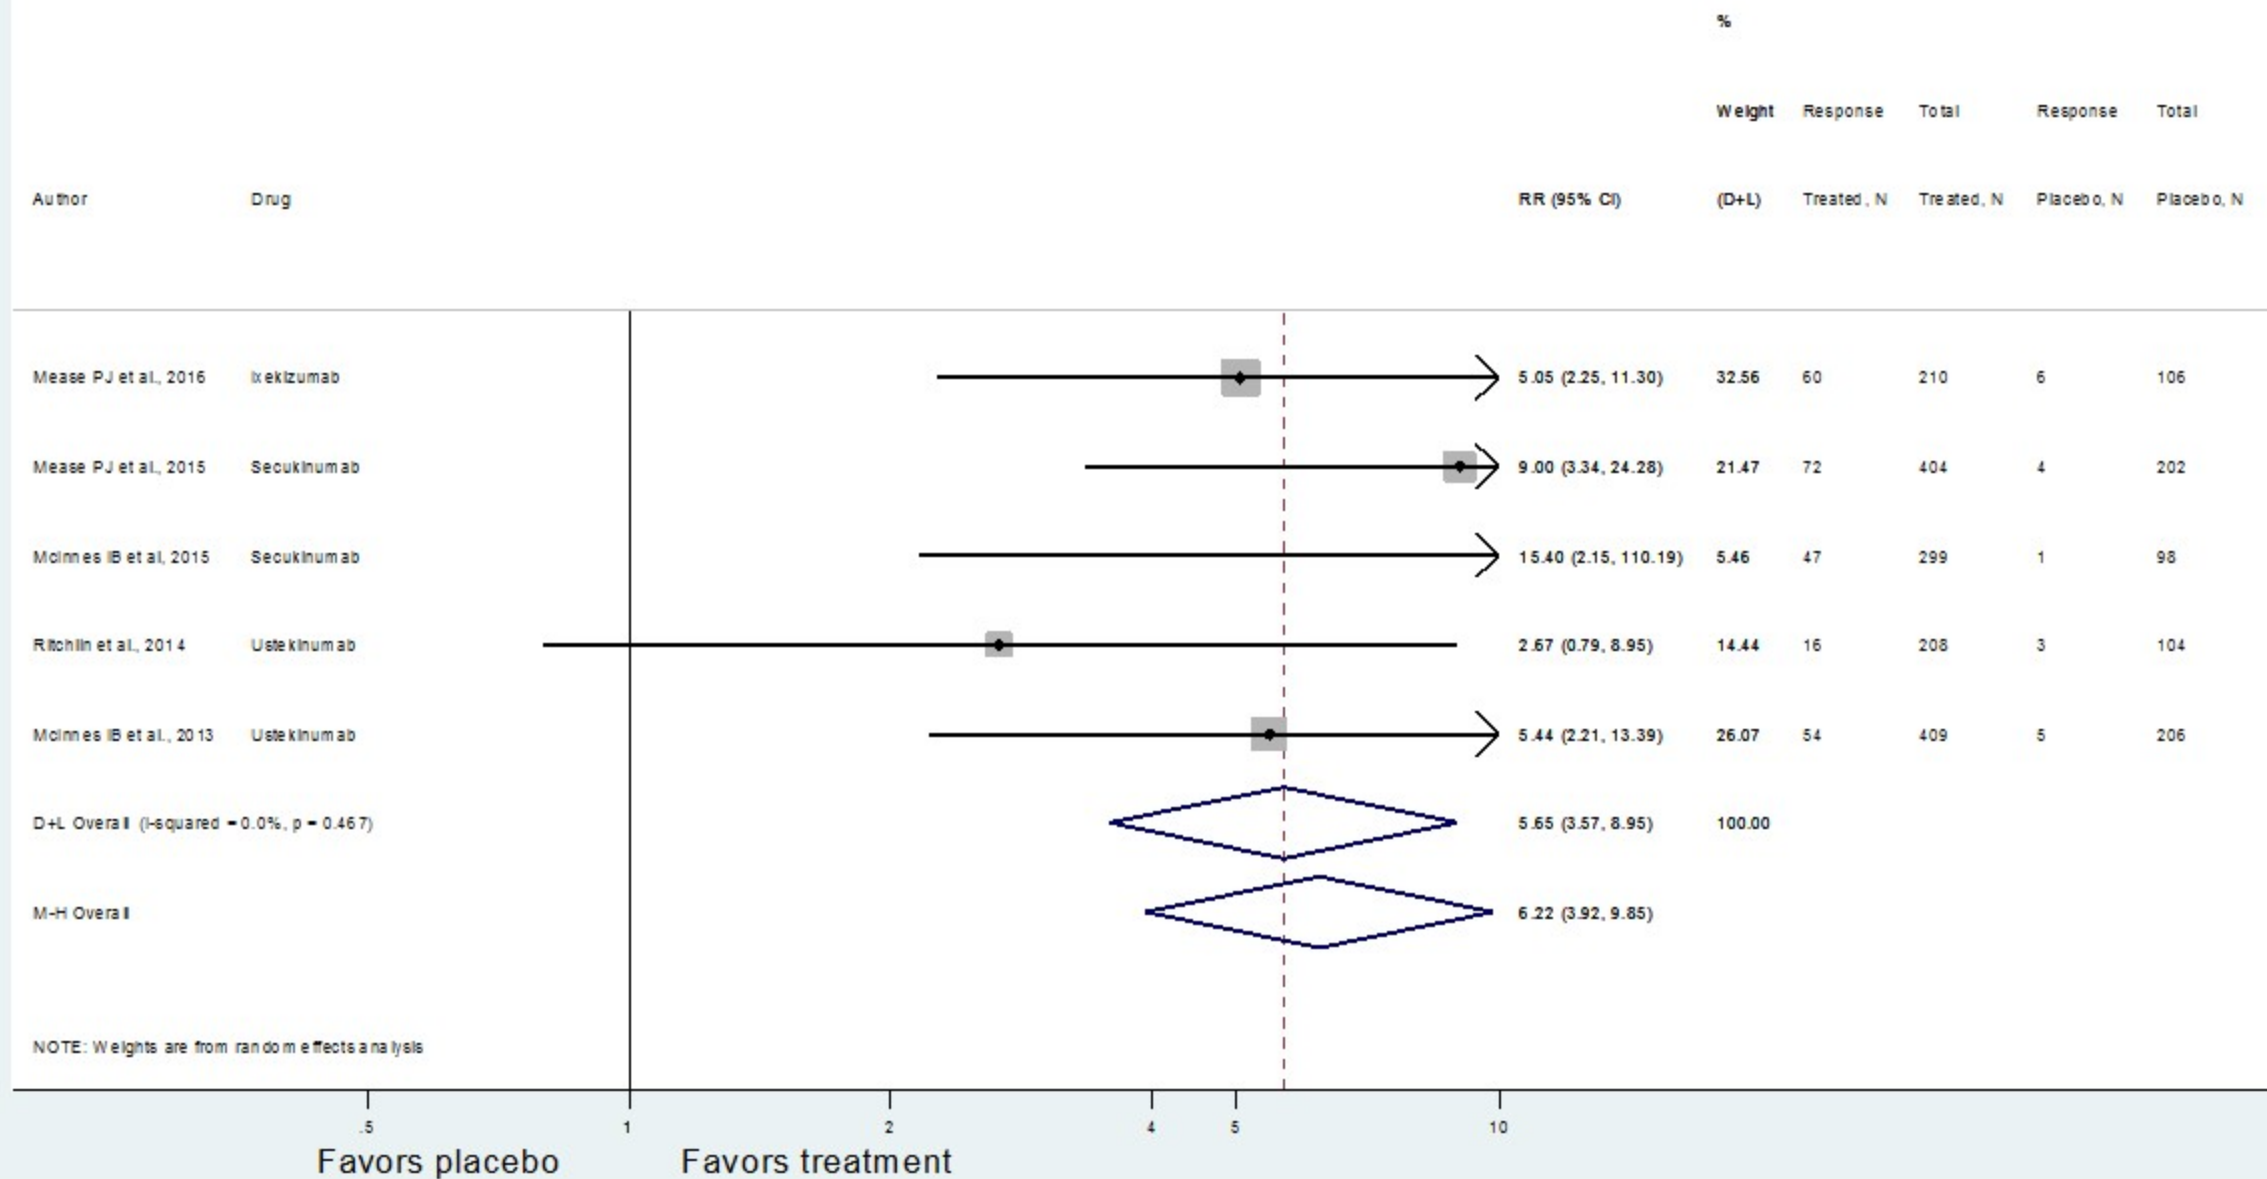

**Suppl. Fig. 2. Forest plot for ACR70 at week 24. Th17 inhibitors vs. placebo.**

Supplement: Supplementary file 4 [file 1]
